# Supplementary material for: Selective colorimetric sensing of deferoxamine with 4-mercaptophenol- and mercaptoacetic acid-functionalized gold nanoparticles via Fe(iii) chelation
Source: Royal Society of Chemistry journal article supplement (doi:10.1039/d1nj03957a), 2021-01-01
Supplement: d1nj03957a1.pdf [file d1nj03957a1.pdf]

## ELECTRONIC SUPPLEMENTARY INFORMATION

*New Journal of Chemistry*

### Selective Colorimetric Sensing of Deferoxamine with 4-Mercaptophenol- and Mercaptoacetic acid-Functionalized Gold Nanoparticles *via* Fe(III)-Chelation

Ömer Kaan Koç,<sup>ab</sup> Elif Ezgi Benli,<sup>b</sup> Nurşah Karahan,<sup>b</sup> Ayşem Üzer,<sup>\*b</sup> and Reşat Apak<sup>\*23</sup>

<sup>a</sup>Institute of Graduate Studies, Istanbul University-Cerrahpaşa, 34320 Avcılar, Istanbul, Turkey

<sup>b</sup>Department of Chemistry, Faculty of Engineering, Istanbul University-Cerrahpaşa, 34320 Avcılar, Istanbul, Turkey

<sup>c</sup>Turkish Academy of Sciences (TUBA), Bayraktar Neighborhood, Vedat Dalokay St. No: 112, Çankaya, 06690 Ankara, Turkey

\*Corresponding Author  
(E-mail: [auzer@iuc.edu.tr](mailto:auzer@iuc.edu.tr))

\*Co-corresponding Author  
(E-mail: [rapak@istanbul.edu.tr](mailto:rapak@istanbul.edu.tr))

## Table of Contents

|                                                                        |           |
|------------------------------------------------------------------------|-----------|
| <b>1. Abbreviations</b>                                                | <b>P3</b> |
| <b>2. Preparation of Solution</b>                                      | <b>P3</b> |
| <b>3. Procedure of LC–MS/MS Method for Validation of DFO Detection</b> | <b>P3</b> |
| <b>4. Supplementary Figures</b>                                        | <b>P4</b> |
| <b>5. Supplementary Table</b>                                          | <b>P8</b> |
| <b>6. Molecular Structures</b>                                         | <b>P8</b> |

## 1. Abbreviations

DFO, deferoxamine; 4MP, 4-mercaptophenol; MAA, mercaptoacetic acid; AuNPs, gold-nanoparticles; NaOH, sodium hydroxide; MeOH, methanol; FA, formic acid.

## 2. Preparation of Solutions

For Au-nanoparticles synthesis, HAuCl<sub>4</sub> solution (0.01%, w/v) and trisodium citrate solution (1.0%, w/v) as both stabilizer and reducing agent were freshly prepared in ultrapure water. Sodium hydroxide stock solution at 0.1 M used for pH adjustment was prepared in ultrapure water. 4MP solution at  $1.0 \times 10^{-4}$  M and MAA solution at  $1.0 \times 10^{-4}$  M were daily prepared in ultrapure water for modification of AuNPs. Ammonium acetate buffer (pH 7.0) was prepared in ultrapure water. Fe(III) stock solution at  $1.0 \times 10^{-4}$  M was prepared in ultrapure water:HCl (25:1, v/v). DFO stock solution at  $1.0 \times 10^{-3}$  M was prepared in ultrapure water. Fe(III) and DFO solutions were stored at +4 °C. The stock solutions of metal ions (Na<sup>+</sup>, Mn<sup>2+</sup>, Mg<sup>2+</sup>, Co<sup>2+</sup>, Zn<sup>2+</sup>, Cr<sup>3+</sup>, As<sup>3+</sup>, Ca<sup>2+</sup>, Fe<sup>2+</sup>, Hg<sup>2+</sup>, and Cu<sup>2+</sup>), anions (Cl<sup>-</sup>, NO<sub>3</sub><sup>-</sup>, and NO<sub>2</sub><sup>-</sup>) and biomolecules {D(+)- glucose, tryptophan, lysine, trypsin, DL-alanine, L-leucine, and glycine} were prepared in ultrapure water and stored at +4 °C. The working solution of DFO for calibration curves of LC-MS/MS analyses was prepared daily at 10.0, 15.0, 20.0, 25.0, and 30.0 μM by diluting from the corresponding stock solution at 100.0 μM with ultrapure water.

## 3. Procedure of LC-MS/MS Method for Validation of DFO Detection

The working solutions of DFO at 10.0–30.0 μM were prepared from the corresponding stock solutions of 100.0 μM in ultrapure water. LC-MS analysis was performed on a UPLC-MS/MS equipment (Shimadzu, 20A) employing an injection volume of 20.0 μL. LC was equipped with a Rectek Ultra-AQ column (100 × 2.1 mm, 3 μm, C18). The column temperature was 40 °C; the injector temperature 4 °C, and the column flow rate 1.0 mL min<sup>-1</sup>. The autosampler wash solution was MeOH:H<sub>2</sub>O (1:1; v/v). HPLC separation was achieved using a binary gradient composed of mobile phase A {FA solution in H<sub>2</sub>O, 0.1% (v/v)} and mobile phase B {FA solution in MeOH, 0.1% (v/v)}. The gradient used was as follows (all % values are v/v): from 0 to 1 min, 50% A; between 1 and 3 min, linear decrease to A 10%; between 3 and 5 min, a hold at A 10%. The mass spectrometer (Shimadzu, 8040) was functioned in the negative ion spray ionization (ESI<sup>-</sup>) mode. During operation, the mass analyser operated in the scan-only mode to obtain a mass spectrum employing selected ion monitoring (SIM) of m/z 561. The setting for MS operation were: nebulizing gas (N<sub>2</sub>) flow, 3.0 mL min<sup>-1</sup>; drying gas flow, 15.0 mL min<sup>-1</sup>; gas temperature, 400 °C.

#### 4. Supplementary Figures

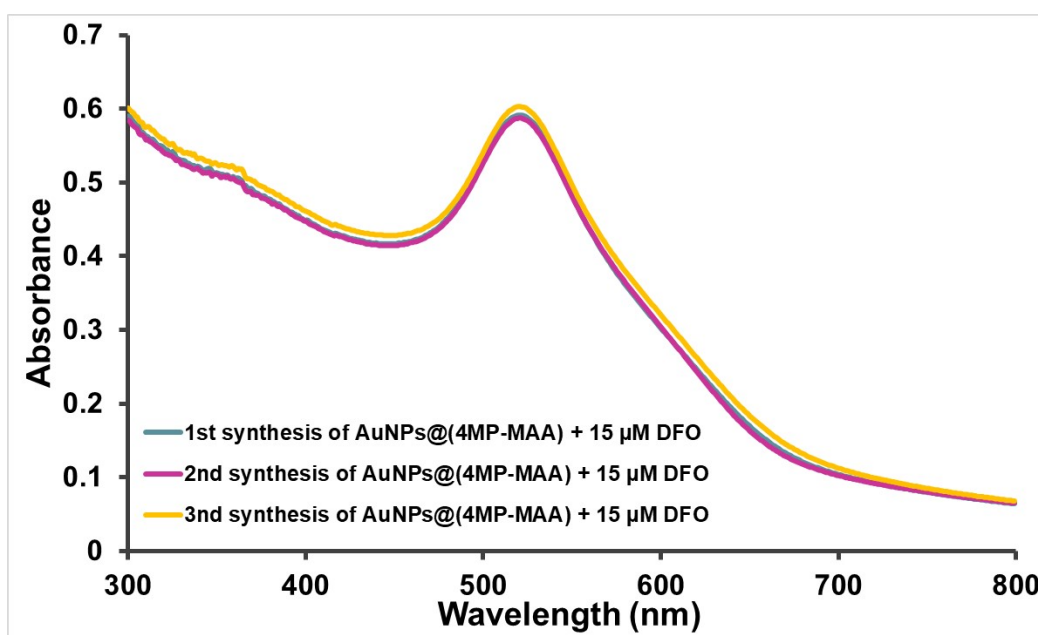

**Fig. S1** UV-vis spectra of simultaneously prepared AuNPs@(4MP-MAA)/Fe(III) with DFO ([DFO]: 15.0  $\mu$ M) (both synthesis and modification were made on the same day under the same conditions).

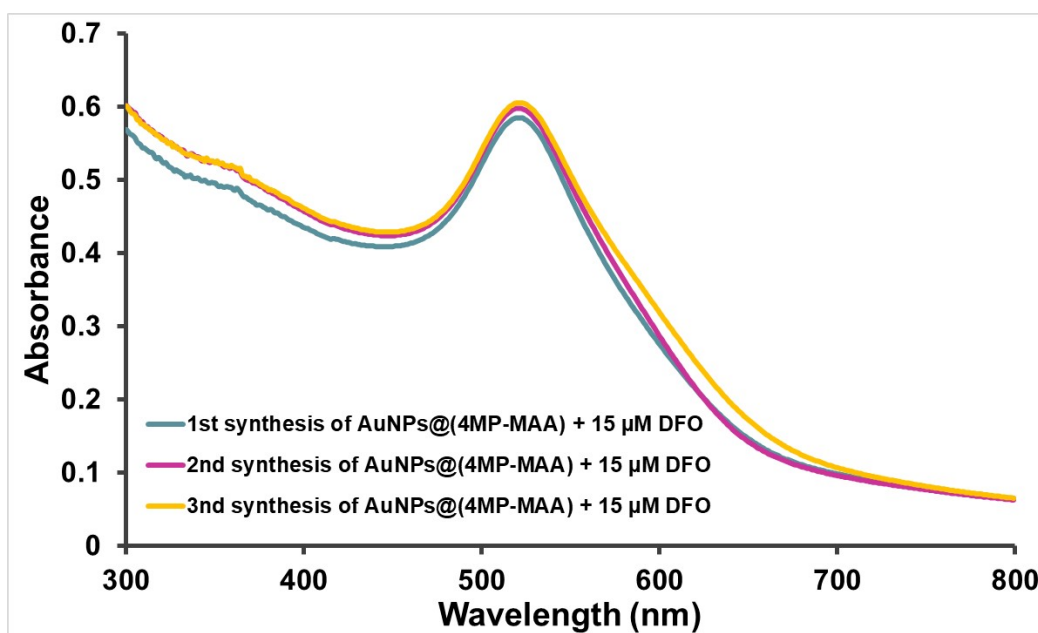

**Fig. S2** UV-vis spectra of simultaneously prepared AuNPs@(4MP-MAA)/Fe(III) with DFO ([DFO]: 15.0  $\mu$ M) (both synthesis and modification were made on different days under the same conditions).

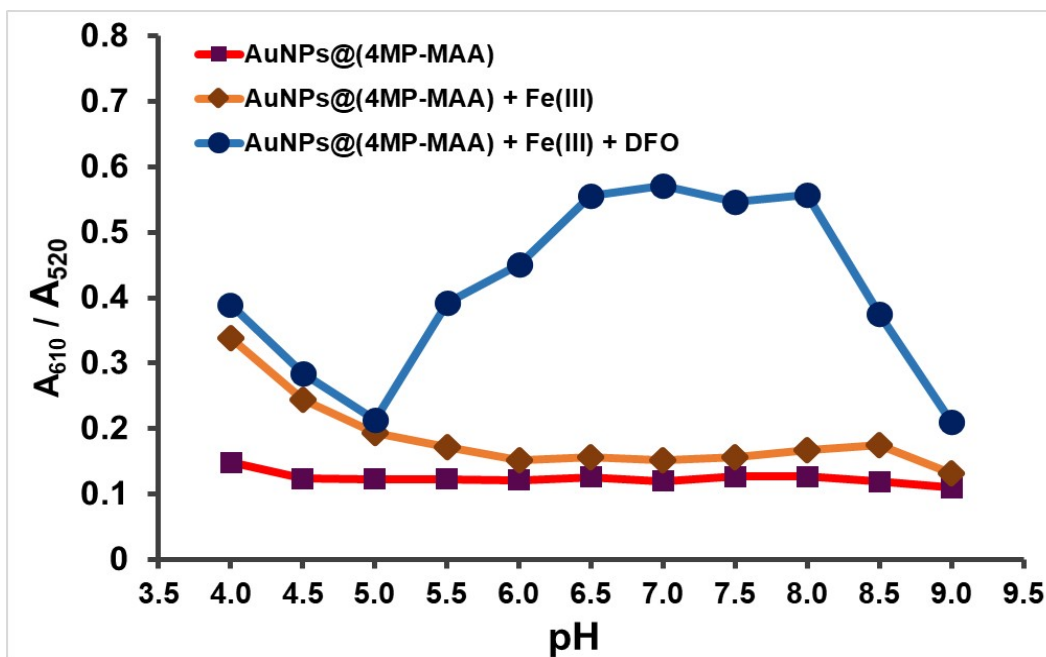

**Fig. S3** Effect of pH (tris-HCl buffer) on the absorbance ratios of AuNPs@(4MP-MAA) (red squares), AuNPs@(4MP-MAA)/Fe(III) {[Fe(III)]: 1.0  $\mu$ M, orange quadrilaterals}, and AuNPs@(4MP-MAA)/Fe(III)/DFO {[Fe(III)]: 1.0  $\mu$ M, [DFO]: 40.0  $\mu$ M, blue dots}.

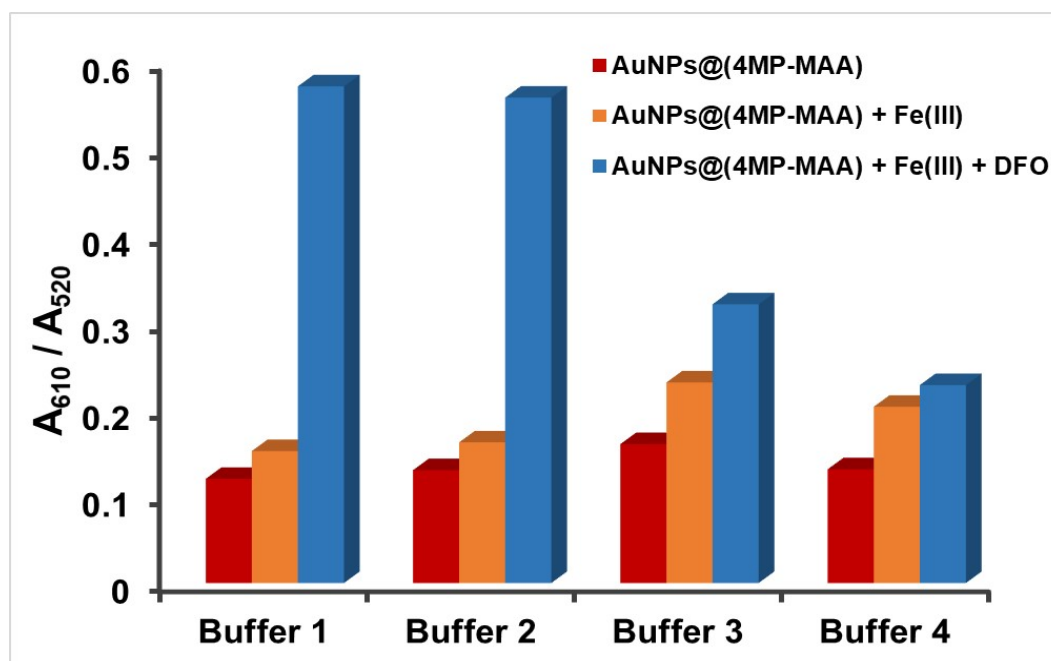

**Fig. S4** Effect of different buffers (pH 7.0; 1: tris-HCl, 2: ammonium acetate, 3: phosphate, and 4: acetic acid-sodium acetate) on the absorbance ratios of AuNPs@(4MP-MAA) (red column), AuNPs@(4MP-MAA)/Fe(III) (orange column), and AuNPs@(4MP-MAA)/Fe(III)/DFO (blue column).

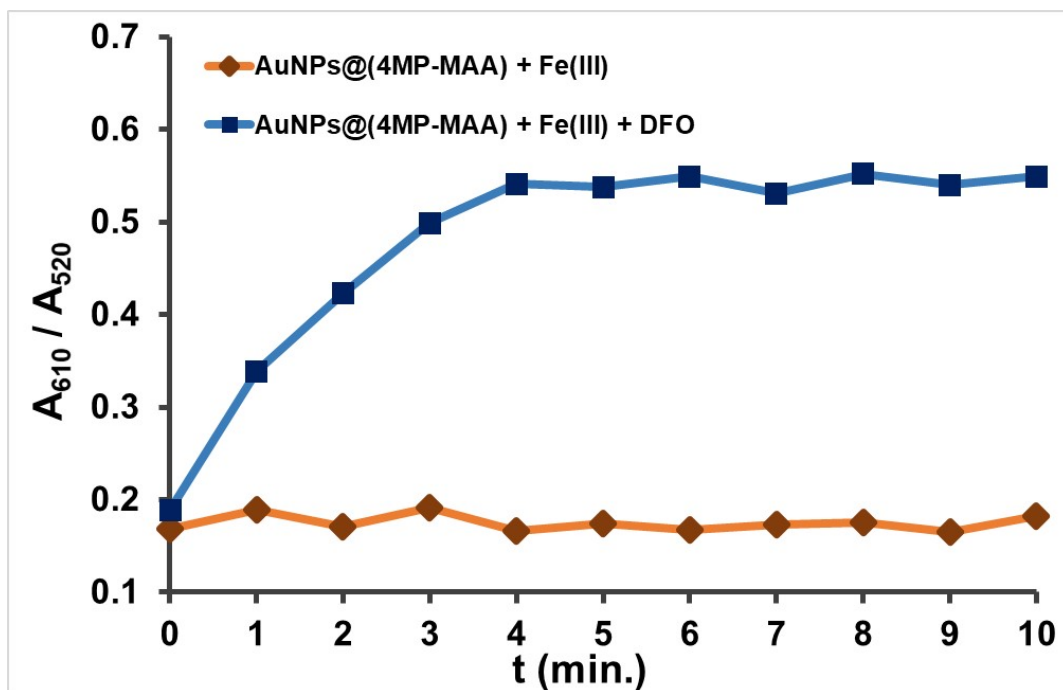

**Fig. S5** Effect of incubation time on the absorbance ratios of the AuNPs@(4MP-MAA)/Fe(III) {[Fe(III)]: 1.0  $\mu$ M, orange quadrilaterals} and AuNPs@(4MP-MAA)/Fe(III)/DFO {[Fe(III)]: 1.0  $\mu$ M, [DFO]: 40.0  $\mu$ M, blue squares}.

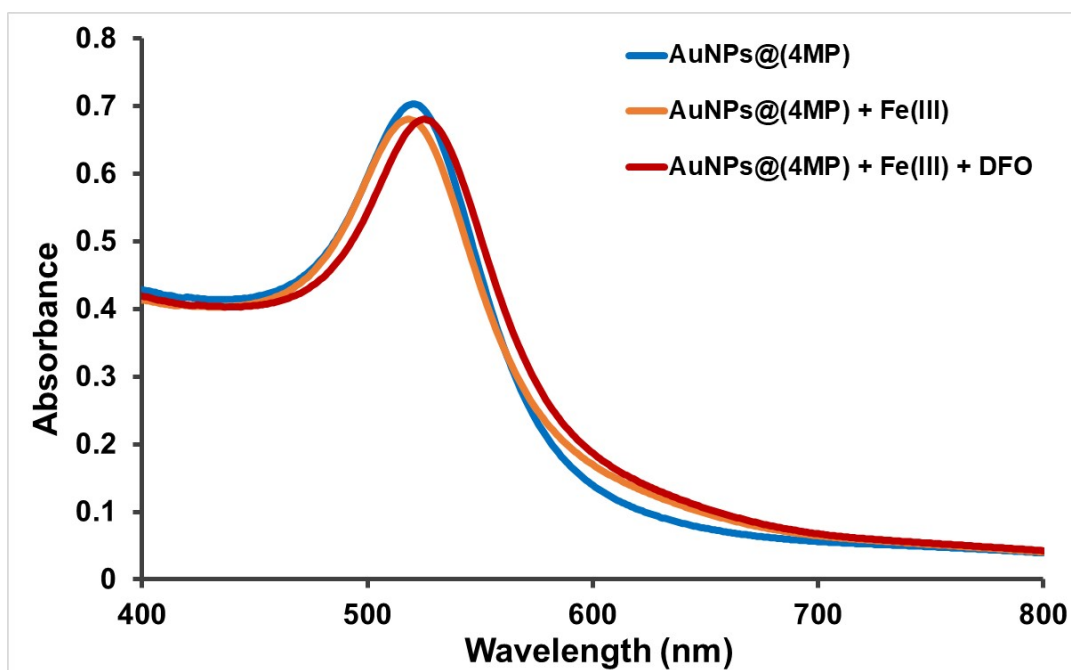

**Fig. S6** UV-vis spectra of AuNPs@(4MP), AuNPs@(4MP)/Fe(III) ([Fe(III)]: 1.0  $\mu$ M), and AuNPs@(4MP)/Fe(III)/DFO ([Fe(III)]: 1.0  $\mu$ M, [DFO]: 40.0  $\mu$ M) system.

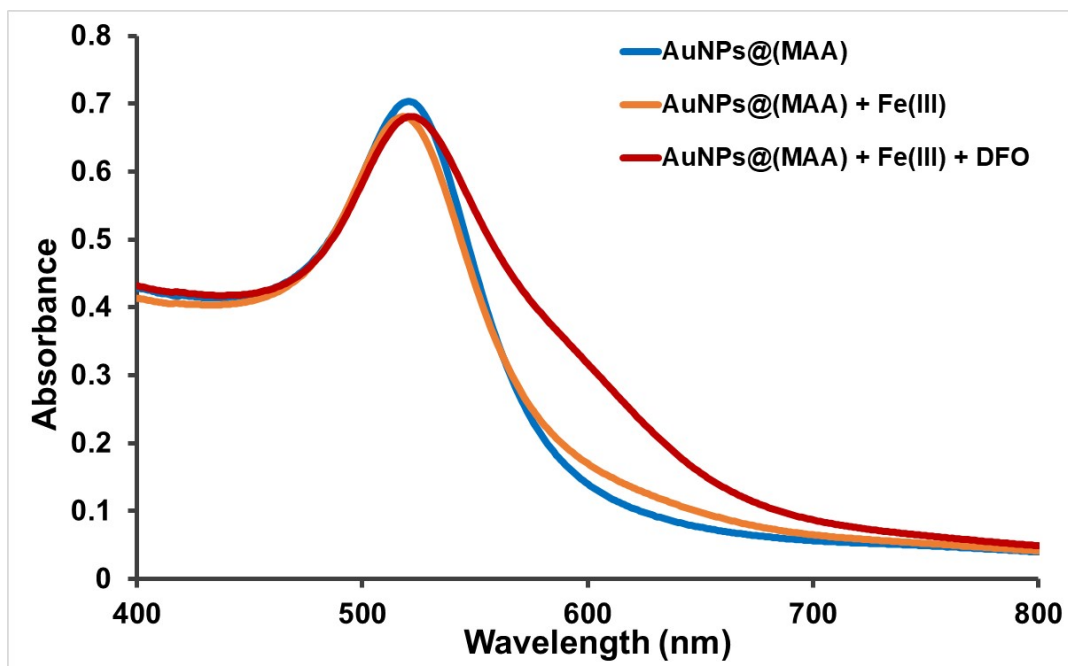

**Fig. S7** UV-vis spectra of AuNPs@(MAA), AuNPs@(MAA)/Fe(III) ([Fe(III)]: 1.0  $\mu$ M), and AuNPs@(MAA)/Fe(III)/DFO ([Fe(III)]: 1.0  $\mu$ M, [DFO]: 40.0  $\mu$ M) system.

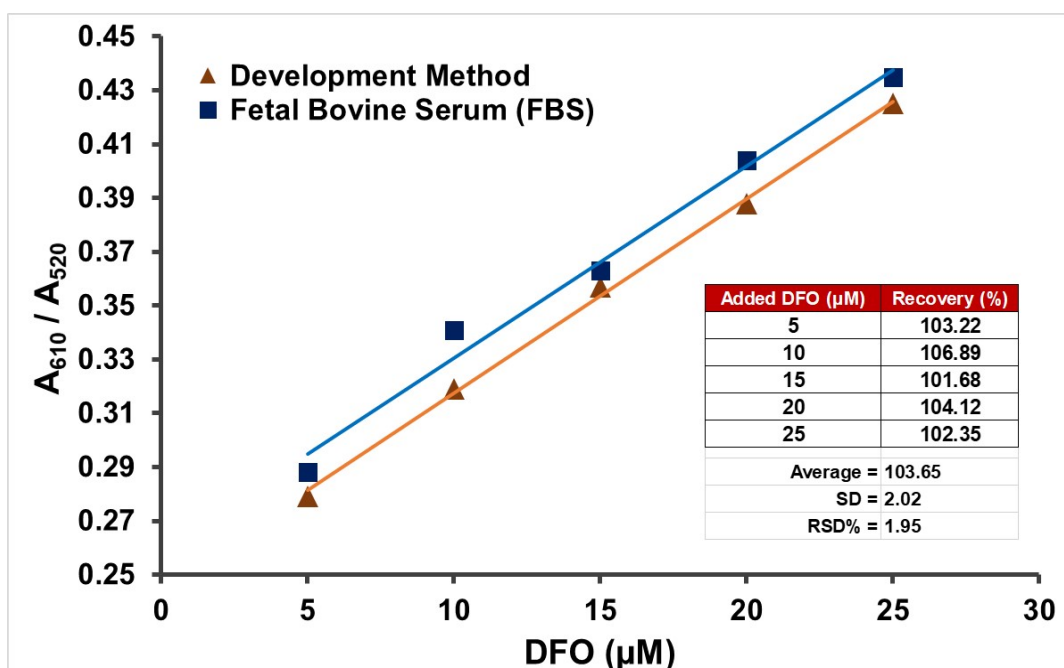

**Fig. S8** Recovery of DFO from diluted Fetal Bovine Serum (FBS) {Inset: Recovery values obtained at different concentrations (5.0–25.0  $\mu$ M) of DFO}.

## 5. Supplementary Table

**Table S1** Recovery (%) of Fe(III) ions and of DFO with the developed nanoprobe system in the presence of metal ions, common anions, and biochemical species.

| Metal Ions  |                      |                  | Anions                        |                      |                  | Biochemical Species |                      |                  |
|-------------|----------------------|------------------|-------------------------------|----------------------|------------------|---------------------|----------------------|------------------|
| Interferent | Recovery (%)         |                  | Interferent                   | Recovery (%)         |                  | Interferent         | Recovery (%)         |                  |
|             | Fe(III) <sup>a</sup> | DFO <sup>b</sup> |                               | Fe(III) <sup>a</sup> | DFO <sup>b</sup> |                     | Fe(III) <sup>a</sup> | DFO <sup>b</sup> |
| Na(I)       | 103.95               | 96.30            | Cl <sup>-</sup>               | 98.48                | 100.95           | D(+) Glucose        | 95.28                | 100.16           |
| Mn(II)      | 104.30               | 101.44           | CO <sub>3</sub> <sup>2-</sup> | 97.72                | 104.34           | Tryptophan          | 94.31                | 102.41           |
| Mg(II)      | 105.19               | 103.85           | NO <sub>3</sub> <sup>-</sup>  | 102.27               | 105.46           | Lysine              | 97.87                | 102.57           |
| Co(II)      | 103.09               | 102.41           | NO <sub>2</sub> <sup>-</sup>  | 94.93                | 104.12           | Trypsin             | 100.37               | 99.83            |
| Zn(II)      | 101.81               | 103.69           |                               |                      |                  | DL-Alanine          | 104.92               | 99.19            |
| Cr(III)     | 96.21                | 102.57           |                               |                      |                  | L-Leucine           | 95.45                | 100.32           |
| As(III)     | 95.42                | 99.35            |                               |                      |                  | Glycine             | 100.36               | 102.73           |
| Ca(II)      | 98.48                | 101.92           |                               |                      |                  |                     |                      |                  |
| Fe(II)      | 101.13               | 101.28           |                               |                      |                  |                     |                      |                  |
| Hg(II)      | 104.92               | 98.39            |                               |                      |                  |                     |                      |                  |
| Cu(II)      | 100.71               | 100.96           |                               |                      |                  |                     |                      |                  |

<sup>a</sup>Percentage recoveries of Fe(III) ions with the AuNPs@(4MP-MAA) sensing system in the presence of metal ions, common anions, and biochemical species. <sup>b</sup>Percentage recoveries of DFO with the AuNPs@(4MP-MAA) sensing system in the presence of metal ions, common anions, and biochemical species.

## 6. Molecular Structures

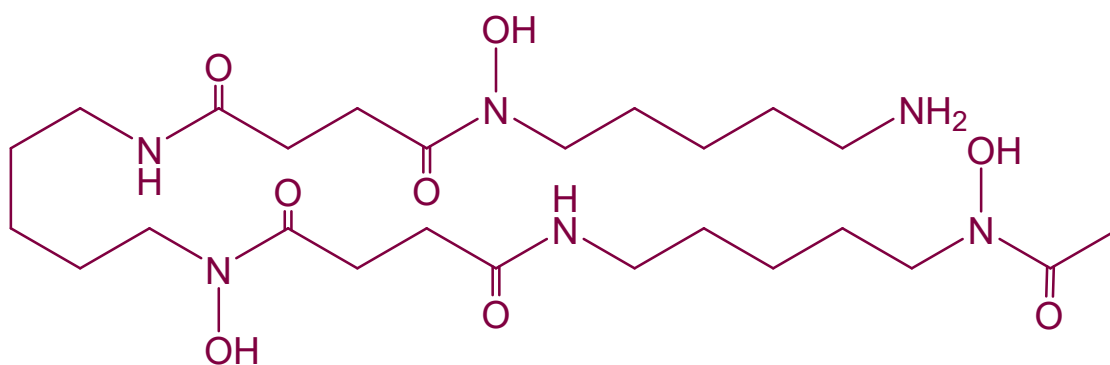

**Structure 1** Molecular structure of deferoxamine (DFO, Molecular formula: C<sub>25</sub>H<sub>48</sub>N<sub>6</sub>O<sub>8</sub>, Molar mass: 656.79 g.mol<sup>-1</sup>)



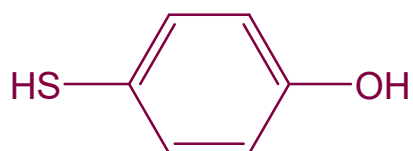

**Structure 2** Molecular structure of 4-mercaptophenol (4MP, Molecular formula:  $C_6H_6OS$ , Molar mass:  $126.18 \text{ g}\cdot\text{mol}^{-1}$ ).

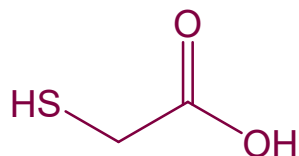

**Structure 3** Molecular structure of mercaptoacetic acid (MAA, Molecular formula:  $C_2H_4O_2S$ , Molar mass:  $92.12 \text{ g}\cdot\text{mol}^{-1}$ ).
